# Supplementary material
Source: MDPI journal article supplement (https://www.mdpi.com/2571-8797/5/3/40)
Supplement: s1 [file s1]

## Supporting information

### Metal-supported TiO<sub>2</sub>/SiO<sub>2</sub> core-shell nanospheres photocatalyst for efficient sunlight-driven organic pollutant degradation

M. R. Karimi Estahbanati<sup>1</sup>, Thuy-Dung Vu<sup>1</sup>, Trong-On Do<sup>1</sup>, Zahra Nayernia<sup>2</sup> and Maria C. Iliuta<sup>1\*</sup>

<sup>1</sup> Université Laval, Chemical engineering department, 1065 avenue de la Médecine, Québec, QC, G1V 0A6, Canada

<sup>2</sup> School of Chemical and Petroleum Engineering, Shiraz University, Mollasadra St., Shiraz, 7193616511, Iran

#### BET analysis

Nitrogen adsorption and desorption isotherms of the samples were measured at -196 °C using Quantachrome Autosorb-1 MP analyser. Before the measurement, the samples were outgassed under vacuum for 4 h at 120 °C. The specific surface area (BET) was determined from the linear part of the BET equation ( $P/P_0 = 0.05 \pm 0.15$ ). The BET surface area of the samples prepared in this work is summarized in Table S1.

Table S1. BET surface area of the prepared samples in this work.

| Sample                                                                | BET surface area (m <sup>2</sup> /g) |
|-----------------------------------------------------------------------|--------------------------------------|
| SiO <sub>2</sub> NS                                                   | 20                                   |
| Cu-loaded TiO <sub>2</sub> /SiO <sub>2</sub>                          | 109                                  |
| Ni-loaded TiO <sub>2</sub> /SiO <sub>2</sub>                          | 98                                   |
| Pt-loaded TiO <sub>2</sub> /SiO <sub>2</sub>                          | 67                                   |
| H <sub>2</sub> S treated Cu-loaded TiO <sub>2</sub> /SiO <sub>2</sub> | 82                                   |
